# Supplementary material for: Pilot study assessing the structural changes in posttrabecular aqueous humor outflow pathway after trabecular meshwork surgery using swept-source optical coherence tomography
Source: PLoS One. 2018 Jun 28;13(6):e0199739. doi: 10.1371/journal.pone.0199739 (PMC6023224; doi:10.1371/journal.pone.0199739)
Supplement: S1 Dataset — (XLSX) [file pone.0199739.s001.xlsx]

## Sheet: Sheet1
ID	age (years)	sex	Eye side	Side	AHO area pre (pixel)	AHO area post (pixel)	AHO change ratio (Quantitative assessment)	Qualitative assessment	spherical equivalent refraction (diopter)	corneal curvature (mm)	HFA (MD)	glaucoma diagnosis	surgical mode	combined with PEA+IOL	Axial length (mm)	Central corneal thickness (μm)	Trabecular meshwork	IOP pre (mmHg)	IOP post (mmHg)	IOP change ratio
1	73	1	L	nasal	7175	8317	1.15916	1	3.25	7.35	-12.09	0	1	1	24.09	490	1	23	12	-0.478261
2	63	1	L	temporal	2292	2325	1.0144	1	-9.625	7.7	-10.82	0	0	1	25.68	526	0	16	15	-0.0625
2	63	1	L	nasal	1796	1848	1.02895	1	-9.625	7.7	-10.82	0	0	1	25.68	526	1	16	15	-0.0625
3	62	0	L	temporal	7595	6643	0.874654	3	-4	7.69	-5.08	0	1	1	25.92	547	1	18	16	-0.111111
3	62	0	L	nasal	2082	2006	0.963497	3	-4	7.69	-5.08	0	1	1	25.92	547	1	18	16	-0.111111
4	73	0	L	nasal	2943	3072	1.04383	1	-3.625	7.72	-12.92	0	0	1	24.29	547	1	15	17	0.133333
5	32	1	R	temporal	3639	3874	1.06458	1	-9.875	7.79	-17.25	0	0	0	27.19	540	0	36	11	-0.694444
5	32	1	R	nasal	5338	5462	1.02323	1	-9.875	7.79	-17.25	0	0	0	27.19	540	1	36	11	-0.694444
6	34	1	L	temporal	2910	3153	1.08351	1	-9.875	7.36	-7.62	1	0	0	26.27	542	0	35	12	-0.657143
6	34	1	L	nasal	2997	2982	0.994995	2	-9.875	7.36	-7.62	1	0	0	26.27	542	1	35	12	-0.657143
7	32	1	R	nasal	2213	2345	1.05965	2	-14.25	7.41	-8.16	1	0	0	27.04	532	0	29	10	-0.655172
8	57	1	L	temporal	3316	3069	0.925513	2	-0.25	7.54	-6.59	1	0	1	24.22	527	0	48	15	-0.6875
9	77	1	R	temporal	2522	2758	1.09358	2	1.125	7.25	-16.85	0	0	1	22.76	476	0	18	13	-0.277778
9	77	1	R	nasal	2723	2642	0.970253	2	1.125	7.25	-16.85	0	0	1	22.76	476	1	18	13	-0.277778
10	69	1	R	nasal	1981	1952	0.985361	2	-7	7.6	-9.16	0	0	1	26.53	526	1	19	20	0.0526316
10	69	1	L	temporal	3603	3707	1.02886	2	-6.25	7.52	-7.06	0	0	1	25.82	520	0	19	19	0
11	78	1	L	temporal	1975	2059	1.04253	2	1.375	7.23	-15.95	0	1	1	22.19	494	1	21	18	-0.142857
11	78	1	L	nasal	1821	1631	0.895662	3	1.375	7.23	-15.95	0	1	1	22.19	494	1	21	18	-0.142857
11	78	1	R	temporal	1915	1871	0.977023	2	0.75	7.55	-15.45	0	1	1	22.26	497	1	20	17	-0.15
11	78	1	R	nasal	2259	2522	1.11642	1	0.75	7.55	-15.45	0	1	1	22.26	497	1	20	17	-0.15
		0: male						1: increased				0: POAG	0: Trabectome	1: +PEA+IOL			1: Removed
		1: female						2: non-significant change				1: Other	1: Suture Trabeculotomy	0: None			0: Unremoved
								3: decreased
